# Supplementary material for: Organic–inorganic nanohybrids based on an AIE luminogen-functional polymer and CdTe/ZnS QDs: morphologies, optical properties, and applications
Source: Royal Society of Chemistry journal article supplement (doi:10.1039/d1py00308a), 2021-01-01
Supplement: d1py00308a1.pdf [file d1py00308a1.pdf]

## **Electronic Supporting Information**

### **Organic-inorganic nanohybrids based on AIE luminogens- functional polymer and CdTe/ZnS QDs: morphologies, optical properties, and applications**

Bingfeng Shi,<sup>a</sup> Jianhua Lü,<sup>b</sup> Ying Liu,<sup>a</sup> Yang Xiao<sup>a</sup> and Changli Lü<sup>\*a</sup>

<sup>a</sup>*Institute of Chemistry, Northeast Normal University, Changchun 130024, P. R. China.*

<sup>b</sup>*Narcotics Control School, Yunnan Police College, Kunming 650223, P. R. China.*

\* Corresponding author.

*E-mail addresses:* [lucl055@nenu.edu.cn](mailto:lucl055@nenu.edu.cn) (C. Lü).

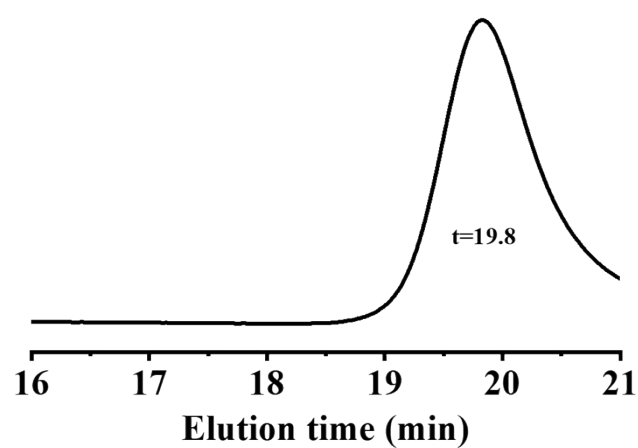

Fig. S1 GPC trace of T-PNI polymer.

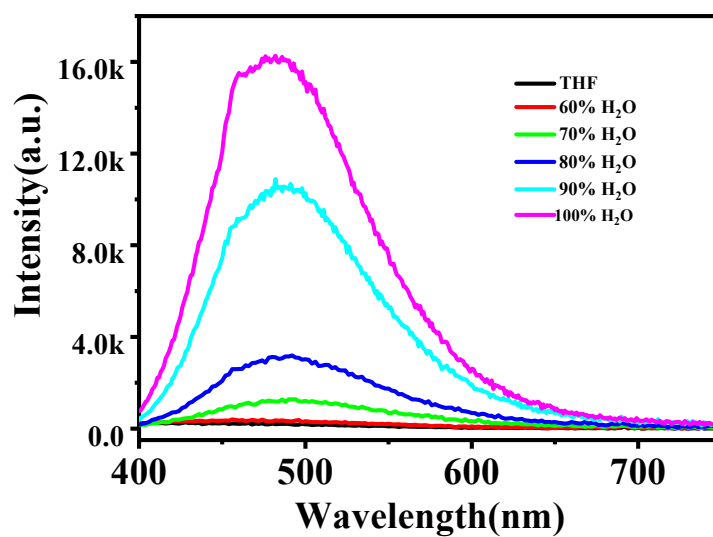

Fig. S2 PL spectra of T-PNI in THF/water mixtures with different water contents ( $1 \text{ mg} \cdot \text{mL}^{-1}$ ),  $\lambda_{\text{ex}} = 346 \text{ nm}$ .

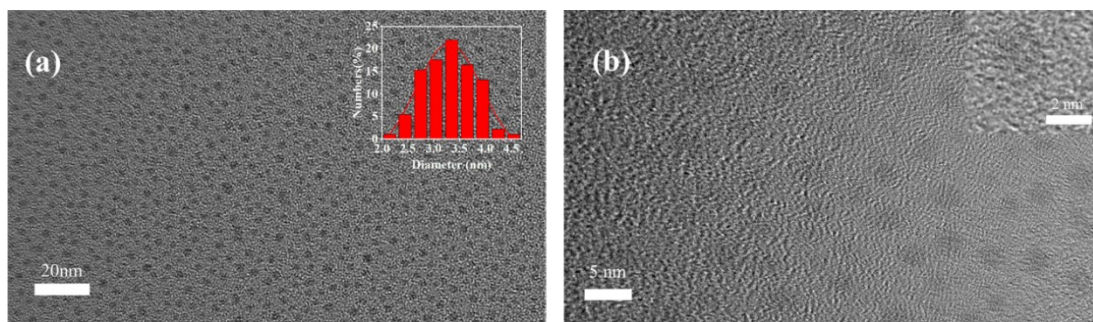

Fig. S3 (a) TEM image of CdTe/ZnS QDs in water and their size-distribution histogram (inset); (b) HRTEM image of CdTe/ZnS QDs.

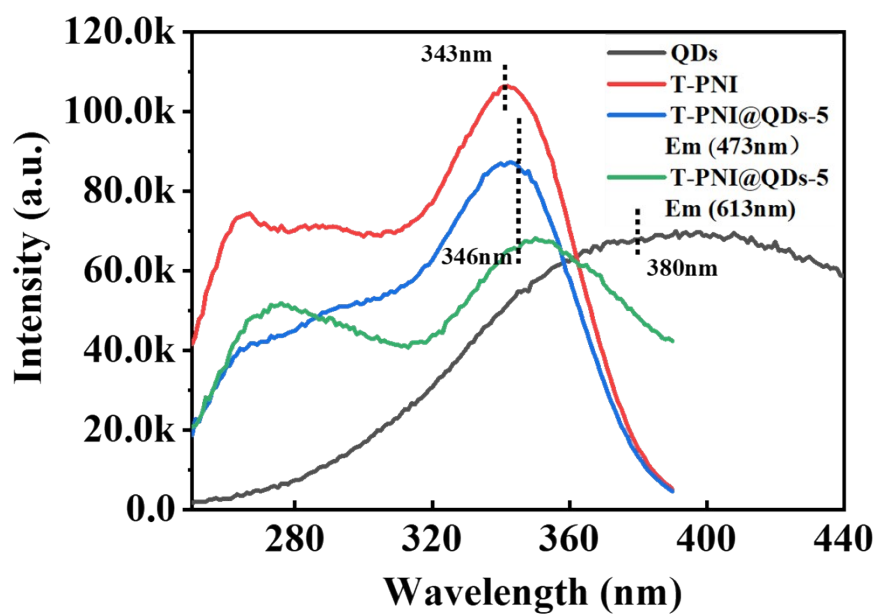

Fig. S4 PL excitation spectra of T-PNI, red-emitting CdTe@ZnS QDs, and T-PNI@QDs systems in water at 25 °C.

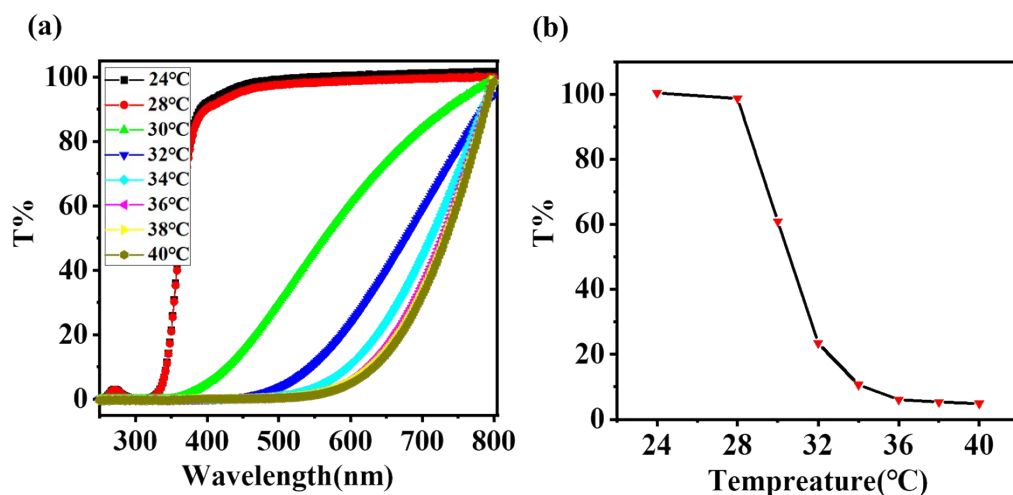

Fig. S5 Optical transmittance (a) and the relative transmittance at 600 nm (b) of aqueous solutions of T-PNI at different temperatures

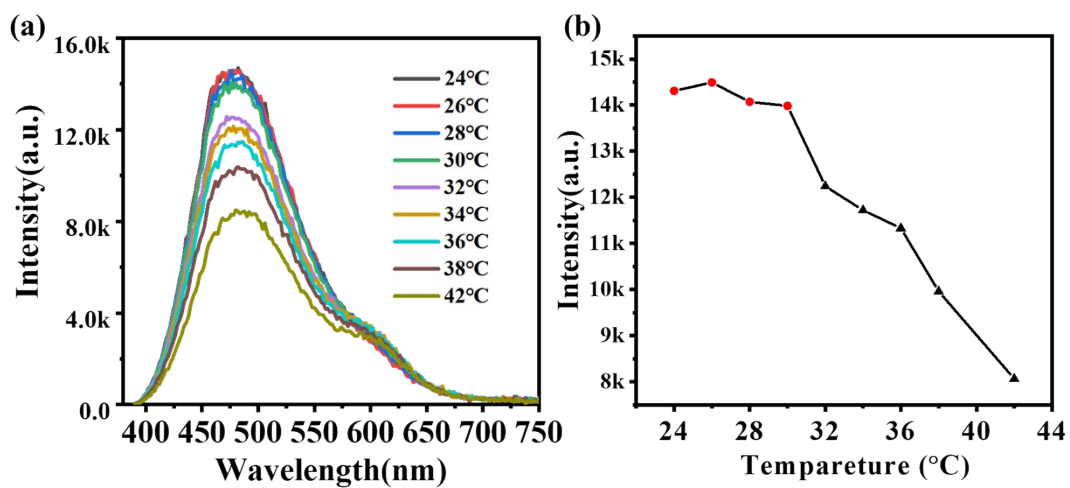

Fig. S6 (a) PL emission spectra of T-PNI at different temperatures. (b) Temperature dependence PL intensity of T-PNI.

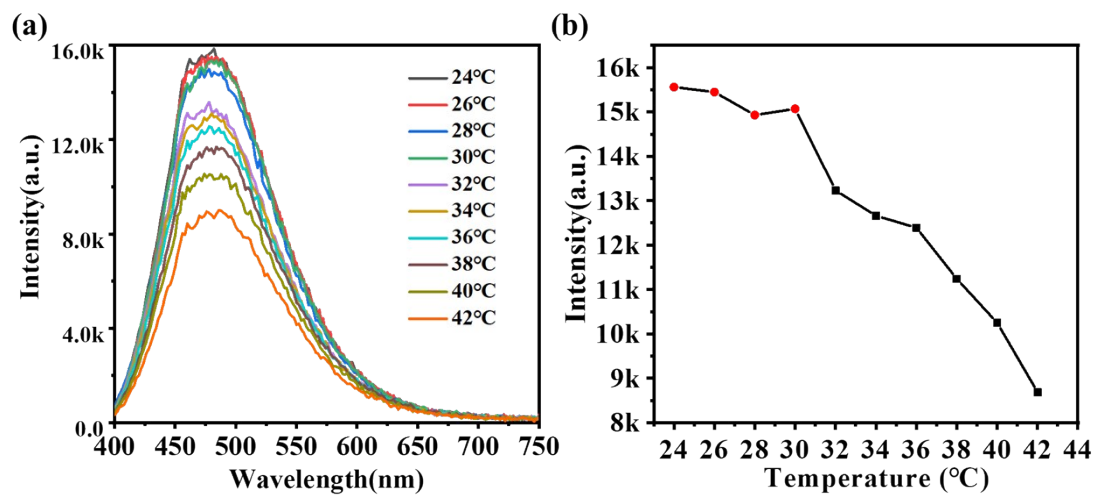

Fig. S7 (a) PL emission spectra of T-PNI-SH at different temperatures. (b) Temperature dependence PL intensity of T-PNI-SH.

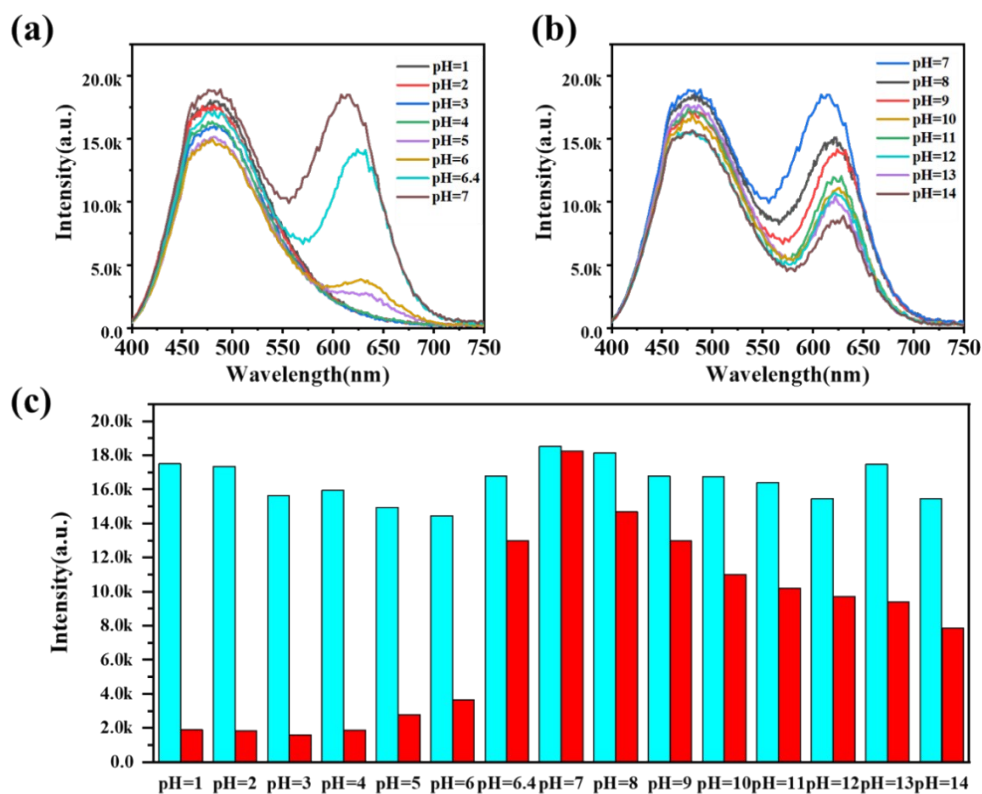

Fig. S8 PL intensity of T-PNI@QDs-5 at different pH values: (a) pH=1-7; (b) pH=7-14. (c) PL intensities of T-PNI@QDs-5 in different pH values. Blue bars: intensity at 473 nm; red bars: intensity at 613 nm.

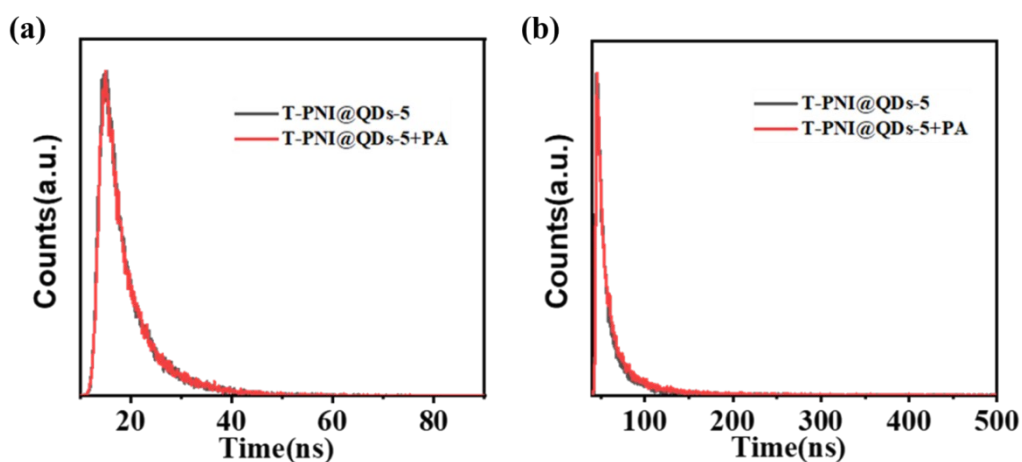

Fig. S9 (a) Fluorescence decay curves of blue-light of T-PNI@QDs-5 and T-PNI@QDs-5+PA; (b) Fluorescence decay curves of red-light of T-PNI@QDs-5 and T-PNI@QDs-5+PA.

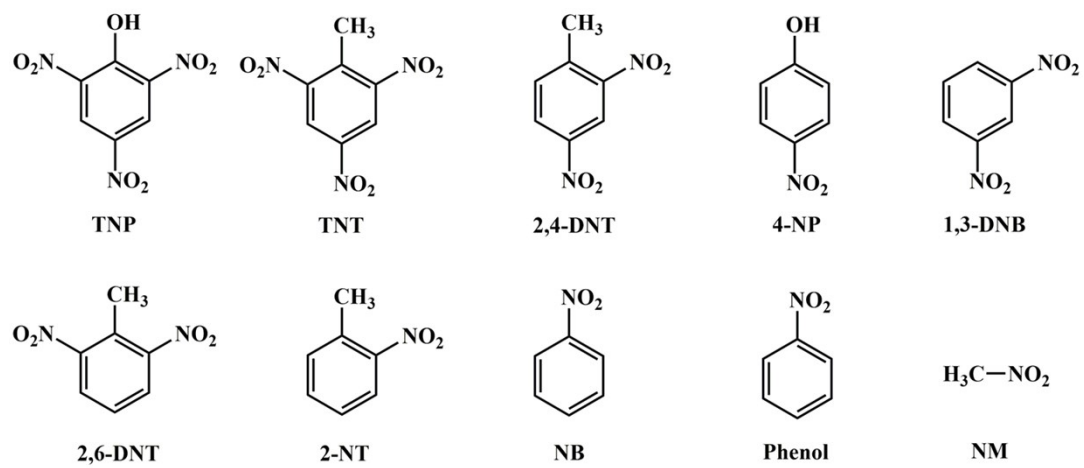

Scheme S1 Structures of different nitro-compounds used in the experiments.

Table S1 A comparative study of the K<sub>sv</sub>, detection limit and medium used for PA detection of some recent representative reports.

| Publication                                                                    | Material used                                      | K <sub>sv</sub> (M <sup>-1</sup> ) | Detection limit              | Medium Used       |
|--------------------------------------------------------------------------------|----------------------------------------------------|------------------------------------|------------------------------|-------------------|
| Present work                                                                   | T-PNI@QDs hybrid nanostructure                     | $2.67 \times 10^4$                 | 4.09 $\mu$ M<br>(blue light) | Water             |
|                                                                                |                                                    | $2.89 \times 10^4$                 | 3.79 $\mu$ M<br>(red light)  |                   |
| <i>Sensor Actuat. B Chem.</i> , <b>2017</b> , 248, 223                         | Antipyrine Schiff base AIE sensor                  | $1.91 \times 10^5$                 | 19.1 $\mu$ M                 | Water             |
| <i>J. Mol. Liq.</i> , <b>2018</b> , 262, 446                                   | 9-Anthraldehyde-based AIE sensor                   | $1.89 \times 10^5$                 | 8.07 $\mu$ M                 | Water             |
| <i>Chem. Commun.</i> , <b>2016</b> , 52, 11284                                 | TPE functionalized metal–organic framework         | $2.8 \times 10^4$                  | —                            | Methanol          |
| <i>RSC Adv.</i> , <b>2015</b> , 5, 76670                                       | TPE-based oxacalixarenes                           | $1.7 \times 10^4$                  | 0.1 mM                       | Water/THF (95/5)  |
| <i>Polym. Chem.</i> , <b>2018</b> , 9, 3158                                    | CdTe QDs/block copolymer hybrid assemblies         | —                                  | 1.27 $\mu$ M                 | Water             |
| <i>Spectrochim. Acta A Mol. Biomol. Spectrosc.</i> , <b>2019</b> , 222, 117168 | Barbituric acid derivatives                        | $4.1 \times 10^4$                  | 2.4 $\mu$ M,                 | Water/THF (90/10) |
| <i>Spectrochim. Acta A Mol. Biomol. Spectrosc.</i> , <b>2020</b> , 233, 118221 | Amine functionalized CdSe@SiO <sub>2</sub> NPs     | $4.0 \times 10^4$                  | 0.05 $\mu$ M,                | Water             |
| <i>Mater. Chem. Phys.</i> , <b>2021</b> , 260, 124130                          | Fe <sub>2</sub> O <sub>3</sub> -CdSe nanocomposite | $4.3 \times 10^4$                  | 2.2 $\mu$ M                  | DMSO              |
